# Supplementary material for: High Performance Reversible Furan-Maleimide Resins Based on Furfuryl Glycidyl Ether and Bismaleimides
Source: Preprints.org preprint supplement (doi:10.20944/preprints202306.2118.v1), 2023-06-30
Supplement: Supplementary file 1 [file supplementary]

Supportting information

Jiawen Wang1, Jixian Li1, Jun Zhang1, Shuyue Liu1, Liqiang Wan1, Zuozhen Liu1,2, Farong Huang1,*

1 Key Laboratory for Specially Functional Materials and Related Technology of Ministry of Education, School of Materials Science and Engineering, East China University of Science and Technology, Shanghai 200237, China.

2 Huachang Polymers Co. Ltd. East China University of Science and Technology Shanghai 200241, P. R. China

* Correspondence: F. Huang (E-mail: fhuanglab@ecust.edu.cn)

1. Structural characterization of monomers

1.1. Furfuryl glycidyl ether (FGE)


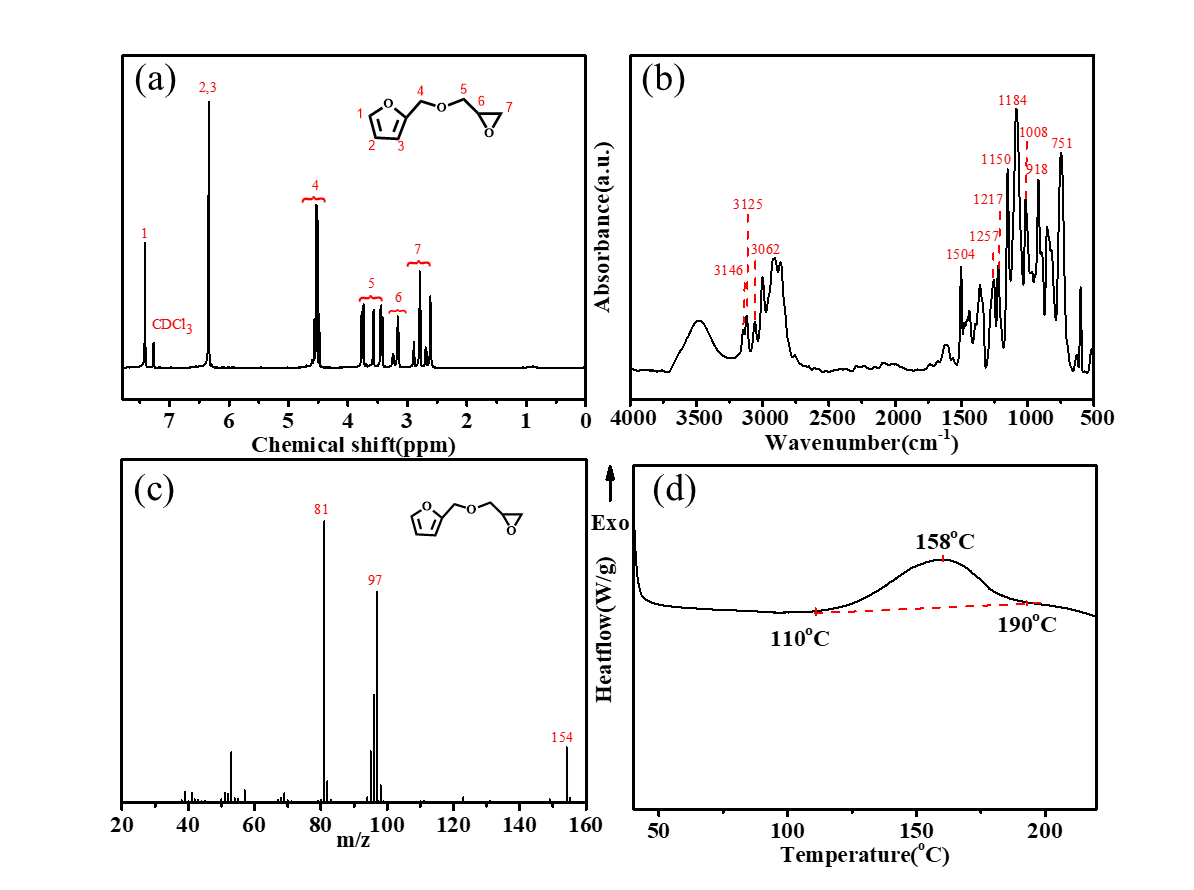


**Figure S1.** 1H-NMR spectra (a), FT-IR spectra (b), EI-MS spectra (c), and DSC curve (d).

1.2. N, N'-hexamethylene-bismaleimide (HBMI)


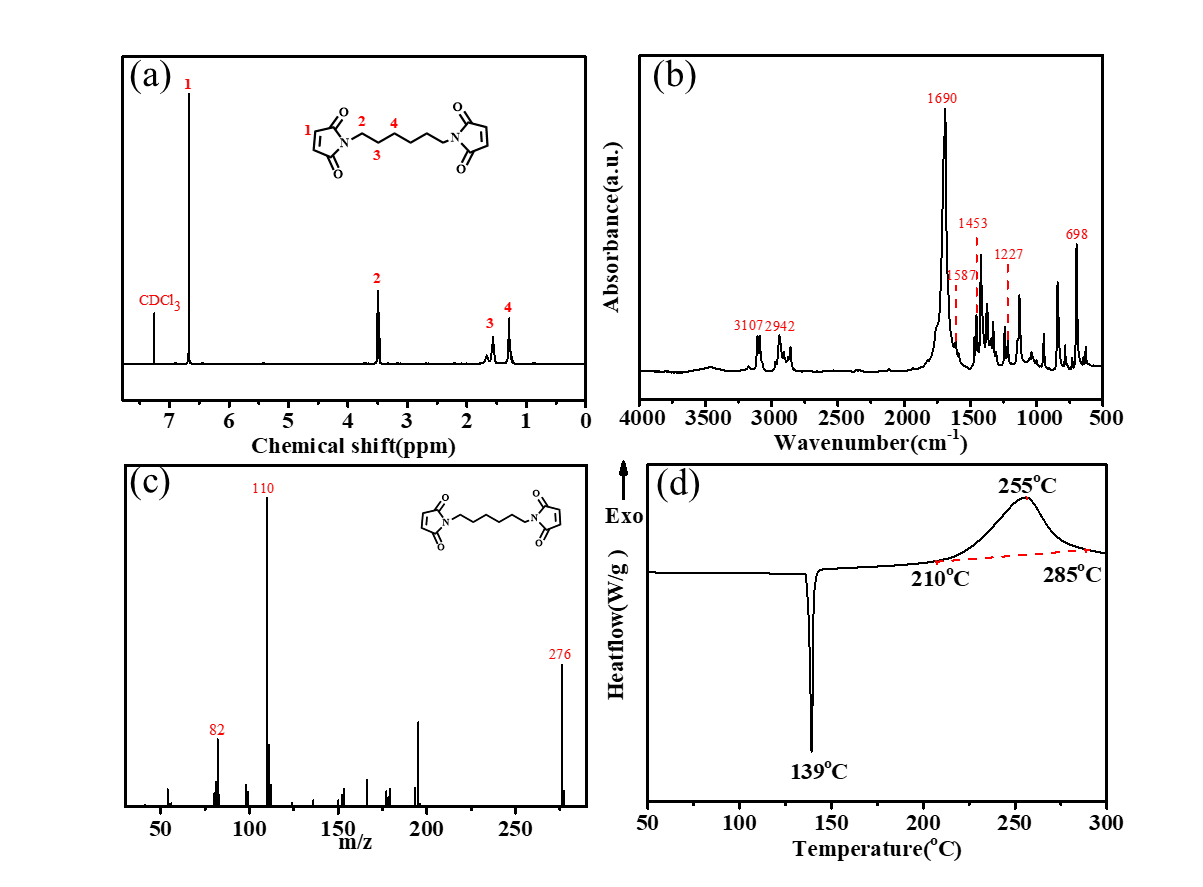


**Figure S2.** 1H-NMR spectra (a), FT-IR spectra (b), EI-MS spectra (c), and DSC curve (d).

2. Curing procedures and structural characterization of FGE-ODA-HBMI resin


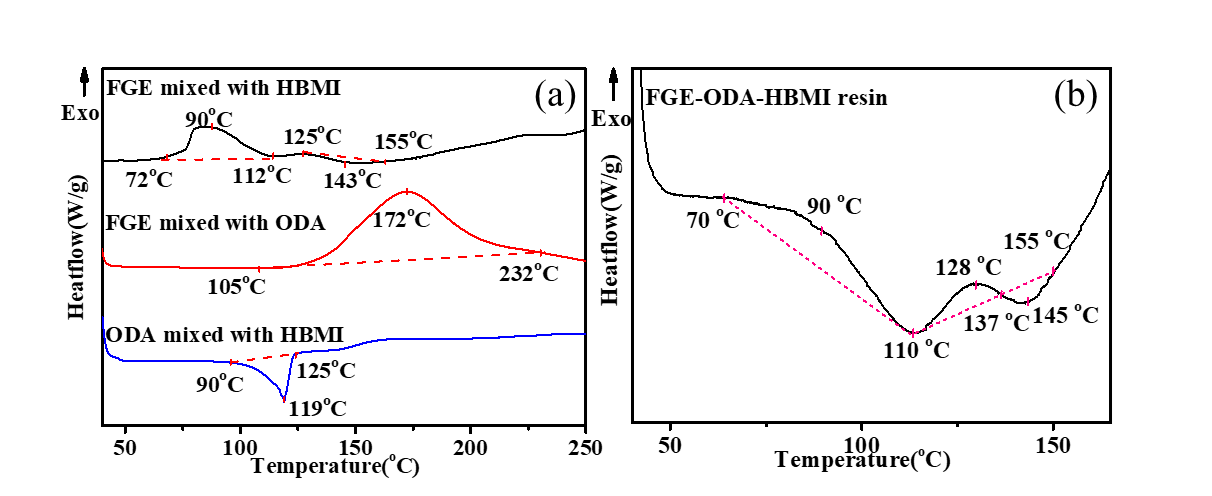


**Figure S3.** DSC curves of FGE mixed with HBMI, FGE mixed with ODA, ODA mixed with HBMI (a), DSC curves of FGE-ODA-HBMI resin (b).


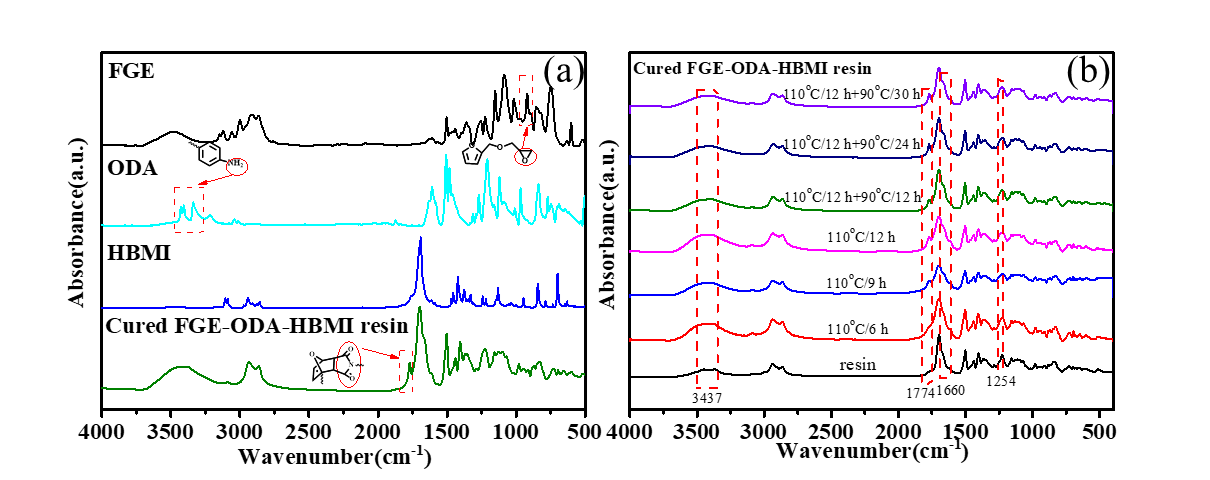


**Figure S4.** FT-IR spectra of the cured FGE-ODA-HBMI resin and its raw materials(a), and FGE-ODA-HBMI resin at different curing stage (b)**.**

3. The sol-gel transformation process of the cured FGE-ODA-HBMI resin


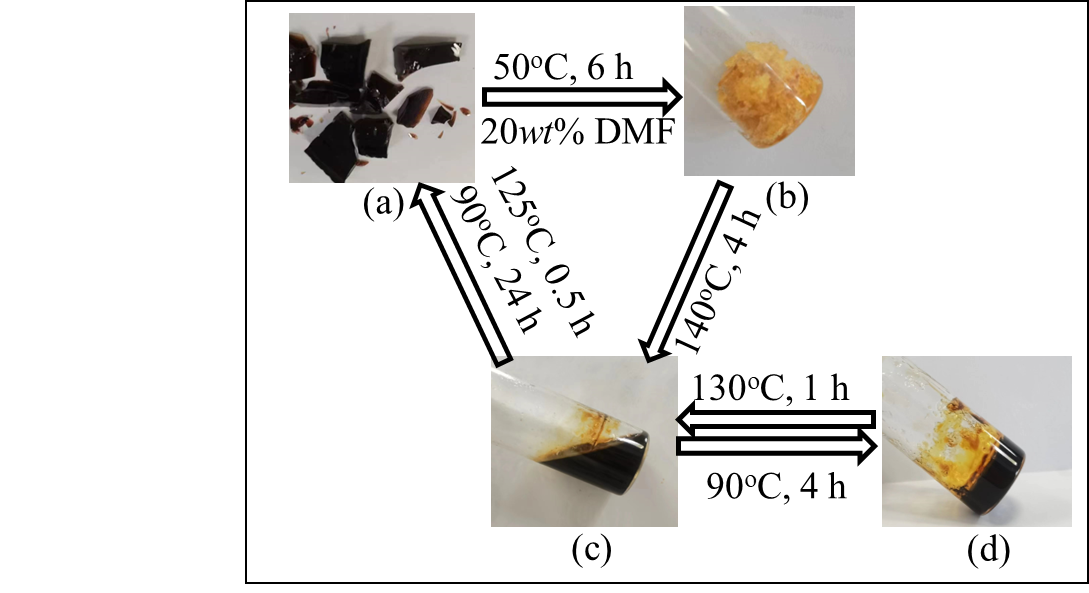


**Figure S5.** The photos of sol-gel transformation process for the cured FGE-ODA-HBMI resin: the small fragments of cured resin (a), the swelled state of cured resin (b), the dissolved state of cured resin (c), the gel state of cured resin (d).
